# Supplementary material for: Conducting poly(o-anisidine-co-o-phenyldiammine) nanorod dispersed epoxy composite coatings: synthesis, characterization and corrosion protective performance
Source: Royal Society of Chemistry journal article supplement (doi:10.1039/c5ra14590b), 2015-01-01
Supplement: c5ra14590b1.pdf [file c5ra14590b1.pdf]

**Conducting Poly (o-anisidine-co-o-phenyldiammine) nanorods dispersed epoxy  
composite coatings: Synthesis, characterization and corrosion protective performance**

**Supplementary information**

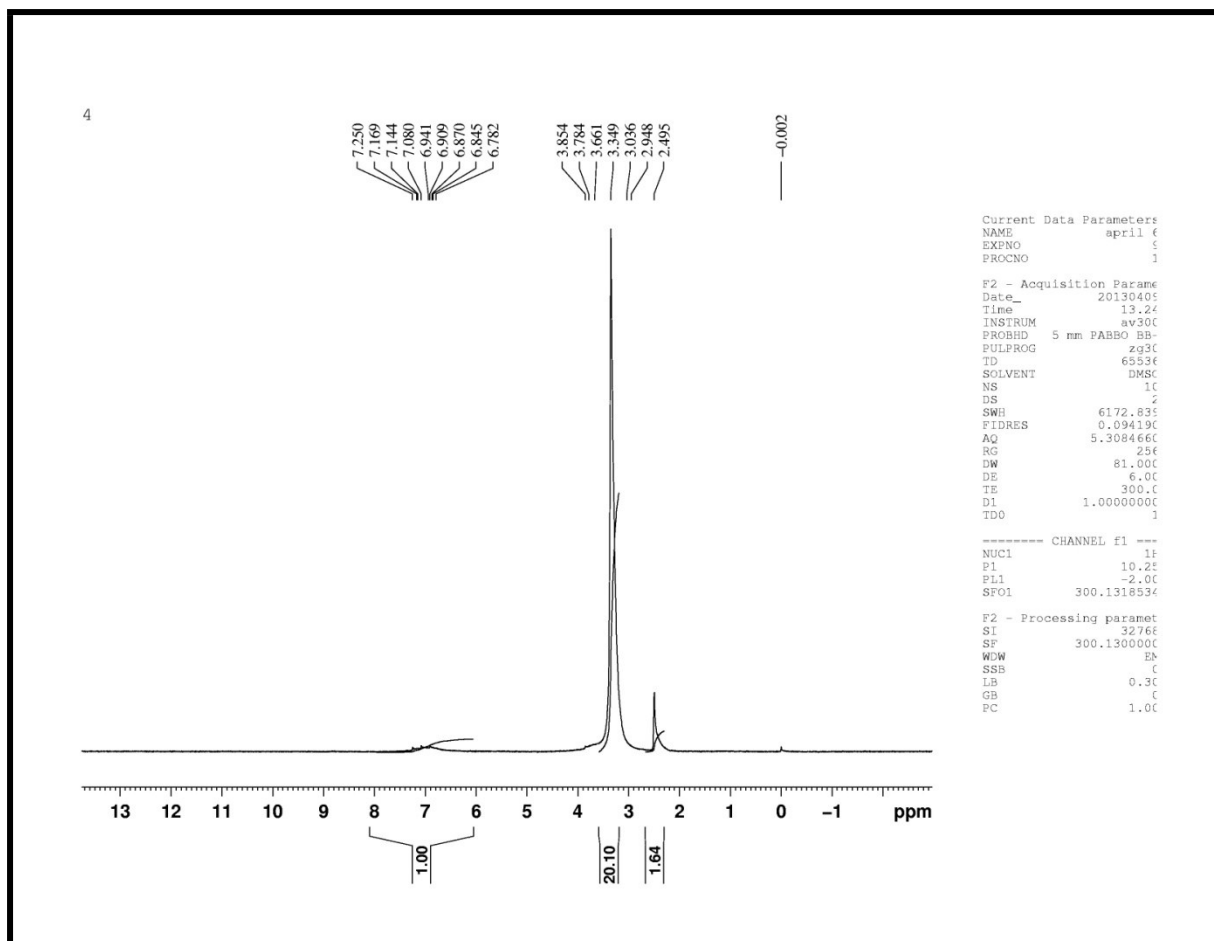

**ESI Fig. 1(a)** NMR of P(oA-co-o-PDA) nanorods (-1 to 13 ppm)

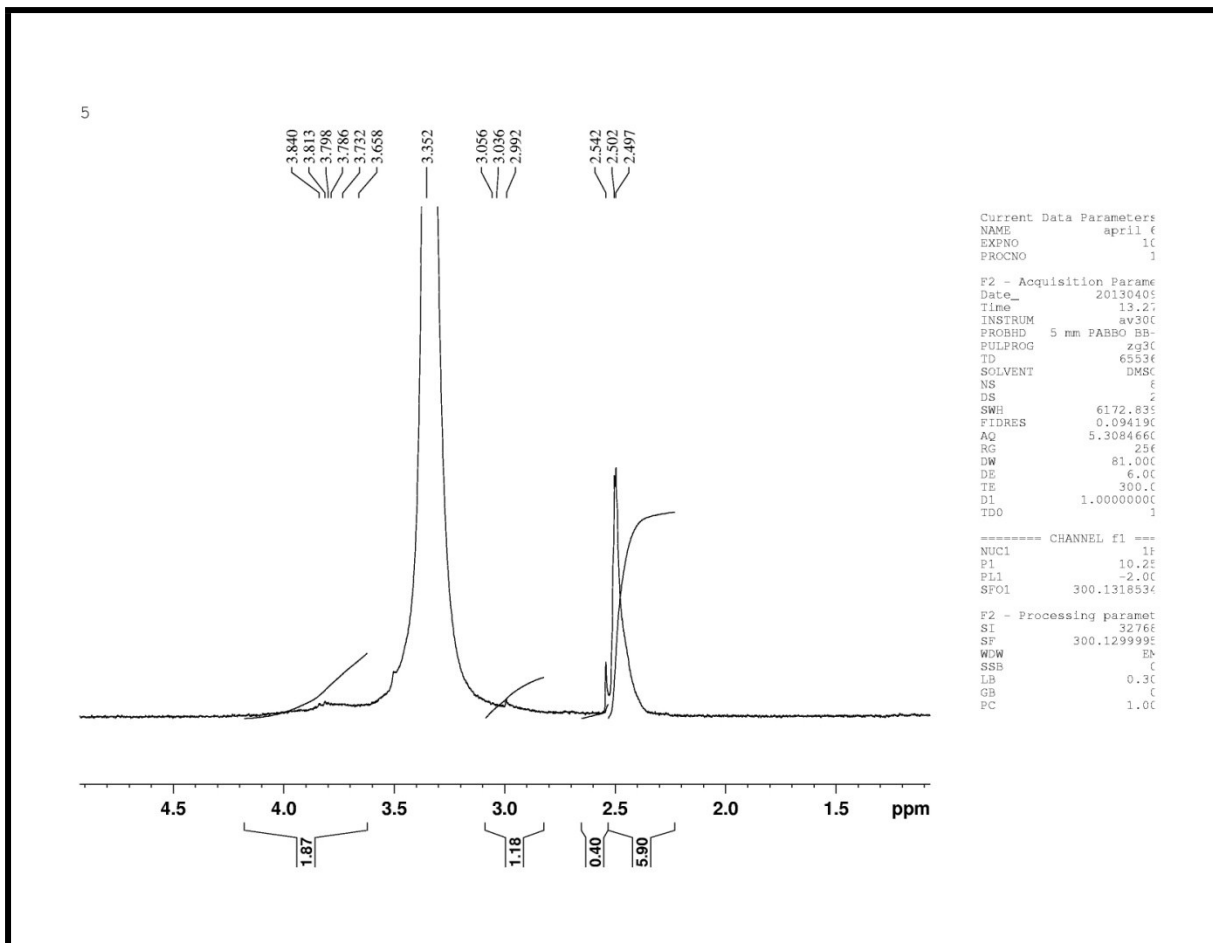

ESI Fig. 1(b) NMR of P(oA-co-o-PDA) nanorods(1.5 to 5 ppm)

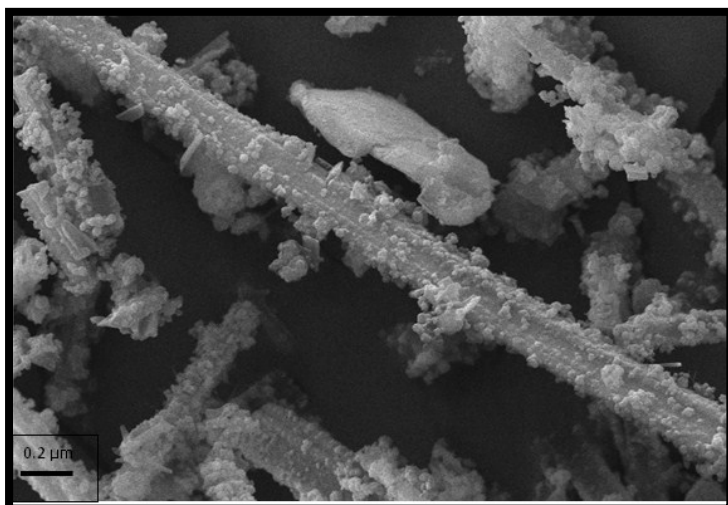

ESI Fig. 2 Enlarged view of SEM micrograph of P(oA-co-o-PDA) nanorods

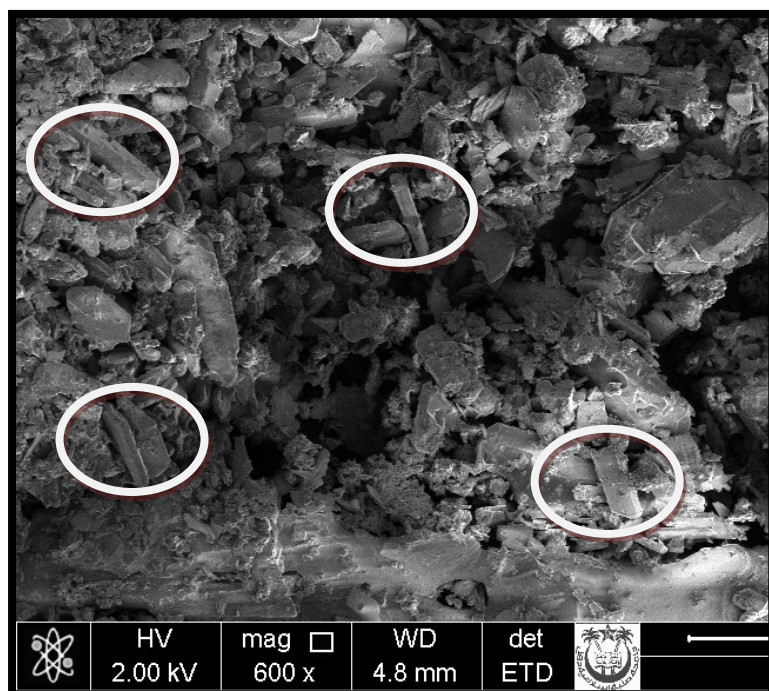

ESI Fig. 3 AFM of P(oA-co-o-PDA) nanorods
